# Supplementary material for: Competition between reactive adsorption desulfurization and olefin hydrogenation over the NiO/ZnO–Al2O3–SiO2 adsorbent
Source: Royal Society of Chemistry journal article supplement (doi:10.1039/d2nj01050j), 2022-01-01
Supplement: d2nj01050j1.pdf [file d2nj01050j1.pdf]

## Electronic Supplementary Information

# Competition between reactive adsorption desulfurization and olefins hydrogenation over NiO/ZnO-Al<sub>2</sub>O<sub>3</sub>-SiO<sub>2</sub> adsorbent

*Feng Ju<sup>#</sup>, Lan Li<sup>#</sup>, Tian Wu, Yao Sun, Hao Ling<sup>\*</sup>*

State Key Laboratory of Chemical Engineering, School of Chemical Engineering, East China

University of Science and Technology, Shanghai 200237, China.

<sup>#</sup>: The authors contribute equally to the article

<sup>\*</sup>Correspondence to: Prof. H. Ling, E-mail: [linghao@ecust.edu.cn](mailto:linghao@ecust.edu.cn)

**Table S1.** Boiling range of the FCC gasoline

\*IBP: Initial boiling point; FBP: Final boiling point.

| Wt% off            | IBP  | 10%  | 20%  | 30%  | 40%  | 50%  | 60%   | 70% | 80%   | 90%   | FBP   |
|--------------------|------|------|------|------|------|------|-------|-----|-------|-------|-------|
| Temperature<br>/°C | 37.6 | 53.9 | 61.8 | 71.2 | 83.9 | 99.2 | 116.3 | 135 | 157.1 | 178.6 | 192.0 |

**Table S2.** Properties of the FCC gasoline

|              | Density(20°C)     | Sulfur content | Nitrogen content |
|--------------|-------------------|----------------|------------------|
|              | g/cm <sup>3</sup> | µg/g           | µg/g             |
| FCC gasoline | 0.734             | 302.2          | 43.5             |

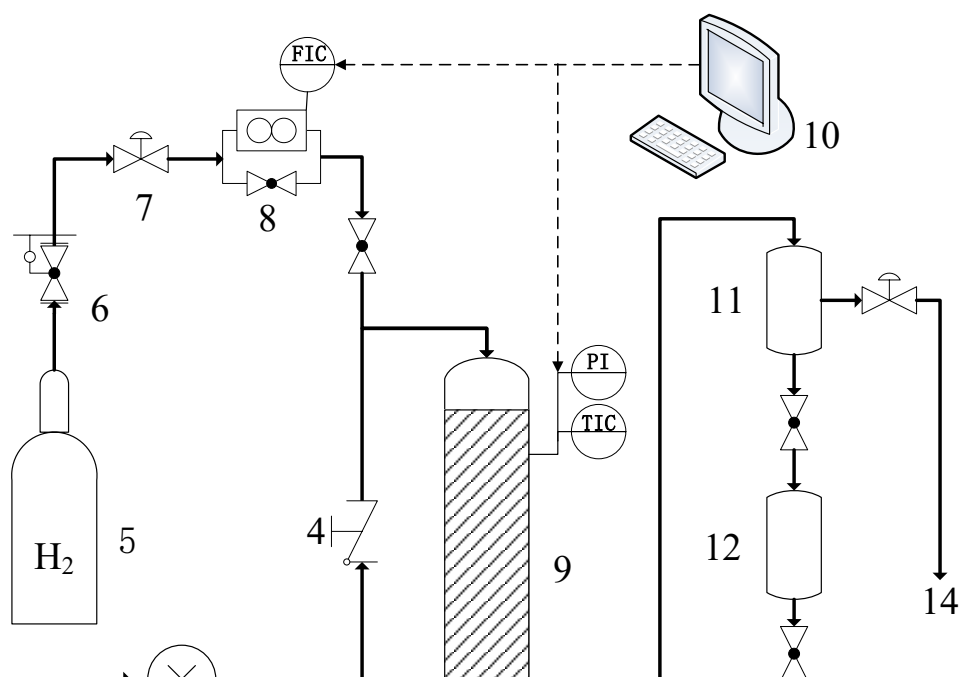

**Fig. S1.** Schematic of fixed-bed micro-reactor. 1. FCC gasoline; 2. Pump; 3. Exhaust valve; 4.

Single globe valve; 5. Carrier gas; 6. Pressure reducer; 7. Safety valve; 8. Volume flow meter; 9. Fixed bed reactor; 10. Workstation; 11. Gas-liquid separation tank; 12. Liquid storage tank; 13. Liquid product port; 14. Gas product port; (FIC, flow instruction and control; PI, pressure instruction; TIC, temperature instruction and control)

The sulfur removal efficiency of adsorbent is defined according to the following equation:

**Table S3.** Hydrocarbon compositions of the FCC gasoline

| Hydrocarbon group<br>composition (wt%) | n-Paraffin | isoparaffin | Olefin | Naphthenic | Aromatic | Total  |
|----------------------------------------|------------|-------------|--------|------------|----------|--------|
| C4                                     | 0.878      | 0.811       | 3.134  | -          | -        | 4.823  |
| C5                                     | 1.366      | 9.389       | 6.261  | 0.171      | -        | 18.187 |
| C6                                     | 1.132      | 9.509       | 5.948  | 2.142      | 0.701    | 19.432 |
| C7                                     | 0.751      | 6.269       | 2.785  | 2.064      | 3.775    | 15.644 |
| C8                                     | 0.461      | 2.683       | 1.836  | 2.452      | 8.009    | 15.441 |
| C9                                     | 0.308      | 1.886       | 1.586  | 1.951      | 8.084    | 13.815 |
| C10                                    | 0.267      | 2.253       | 0.083  | 0.352      | 5.140    | 8.095  |
| C11                                    | 0.094      | 1.354       | 0.065  | 0.214      | 2.387    | 4.114  |
| C12                                    | 0.148      | 0.152       | -      | 0.108      | 1.042    | 1.45   |
| Total                                  | 5.40       | 34.30       | 21.70  | 9.46       | 29.14    | 100    |
